# Supplementary material
Source: Springer Nature journal article supplement (https://www.springermedizin.de/resource/supplementary/12885_2007_1094_MOESM5_ESM.pdf/9471102)

# Gene

LunX

CK19

CEA

VEGF-C

hnRNP  
A2/B1

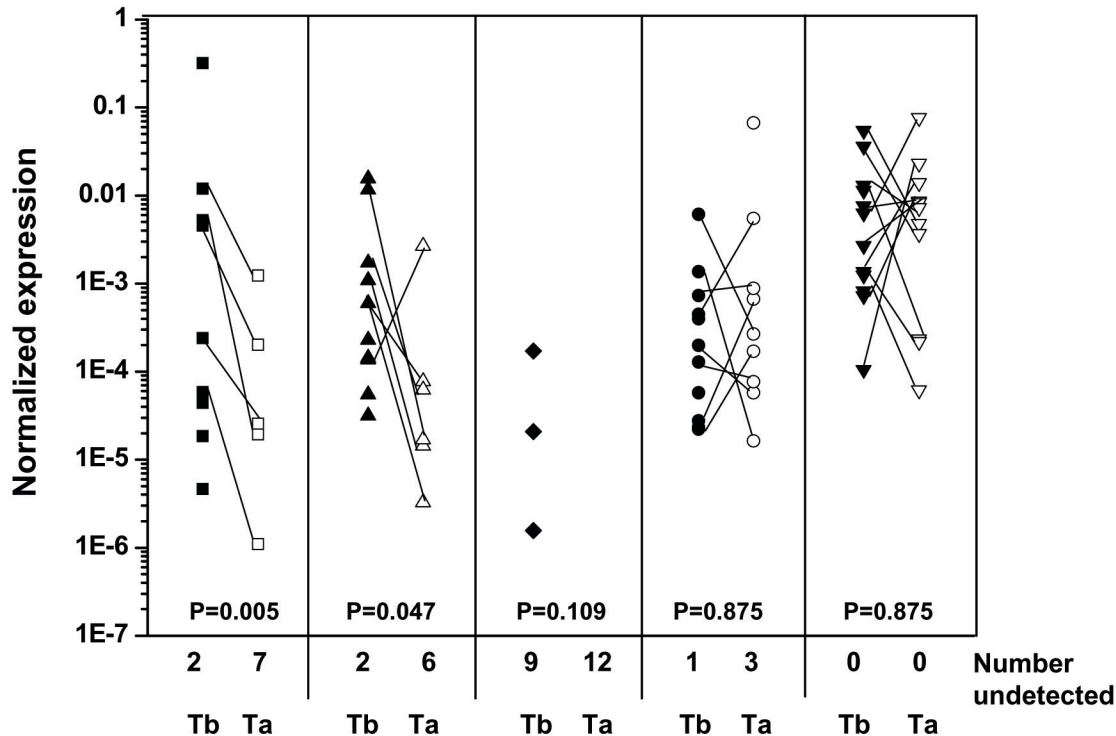

Supplement: MOESM5 [file 9471102]
